# Supplementary material
Source: PubMed Central journal article supplement (PMC4097748)
Supplement: JCM.01626-13_zjm999093520so1.pdf [file JCM.01626-13_zjm999093520so1.pdf]

**Table S1. Annotation of ORFs in a novel 124 Kb *P. aeruginosa* gene island (from 5' to 3')**

| ORF | Start | End   | Length (bp) | Accession Number | Gene Name    | Annotation (highest nucleotide sequence homology)                                                |
|-----|-------|-------|-------------|------------------|--------------|--------------------------------------------------------------------------------------------------|
| 1*  | 1     | 501   | 501         | CP000352         |              | <i>Cupriavidus metallidurans</i> – putative membrane protein                                     |
| 2*  | 766   | 1698  | 933         | CP000352         |              | <i>C. metallidurans</i> – conserved hypothetical protein                                         |
| 3*  | 1817  | 2029  | 213         | CP000352         | <i>alpA</i>  | <i>C. metallidurans</i> – DNA-binding transcriptional activator                                  |
| 4*  | 2072  | 2947  | 876         | CP000352         | <i>soj</i>   | <i>C. metallidurans</i> – ATPase involved in plasmid partitioning Soj                            |
| 5*  | 2931  | 3200  | 270         | CP000352         |              | <i>C. metallidurans</i> – conserved hypothetical protein                                         |
| 6*  | 3193  | 4872  | 1680        | CP000352         |              | <i>C. metallidurans</i> – putative regulator                                                     |
| 7*  | 4887  | 5447  | 561         | CP000352         |              | <i>C. metallidurans</i> – putative regulator                                                     |
| 8*  | 5451  | 6689  | 1239        | CP000352         |              | <i>C. metallidurans</i> – conserved hypothetical protein                                         |
| 9*  | 7119  | 7910  | 792         | CP000352         |              | <i>C. metallidurans</i> – conserved hypothetical protein                                         |
| 10* | 7907  | 8434  | 528         | CP000352         | <i>inrR</i>  | <i>C. metallidurans</i> – integrase regulator R                                                  |
| 11* | 8508  | 8948  | 441         | CP000352         | <i>ssb2</i>  | <i>C. metallidurans</i> – single-stranded DNA binding protein                                    |
| 12* | 8957  | 9097  | 141         | CP000352         |              | <i>C. metallidurans</i> – transposon:CH34 genomic island CMGI-1                                  |
| 13* | 9310  | 11340 | 2031        | CP000352         | <i>topB2</i> | <i>C. metallidurans</i> – DNA topoisomerase III                                                  |
| 14* | 12064 | 12699 | 636         | CP000352         |              | <i>C. metallidurans</i> – cation efflux system protein                                           |
| 15* | 13084 | 13320 | 237         | CP000352         |              | <i>C. metallidurans</i> – conserved hypothetical protein                                         |
| 16* | 13520 | 13708 | 189         | CP000352         |              | <i>C. metallidurans</i> – hypothetical protein                                                   |
| 17* | 13776 | 14174 | 399         | CP000352         | <i>pbrR2</i> | <i>C. metallidurans</i> – transcriptional regulator, MerR-family                                 |
| 18* | 14266 | 17178 | 2913        | CP000352         | <i>cadA</i>  | <i>C. metallidurans</i> – lead/cadmium-transporting ATPase                                       |
| 19* | 17182 | 17682 | 501         | CP000352         | <i>pbrC2</i> | <i>C. metallidurans</i> – prolipoprotein signal peptidase                                        |
| 20* | 18082 | 18330 | 249         | CP000352         |              | <i>C. metallidurans</i> – conserved hypothetical protein                                         |
| 21* | 18668 | 18880 | 213         | CP000352         |              | <i>C. metallidurans</i> – conserved hypothetical protein                                         |
| 22  | 18902 | 19294 | 393         | CP000774         |              | <i>Parvibaculum lavamentivorans</i> - conserved hypothetical protein                             |
| 23  | 19508 | 20245 | 738         | CP000774         |              | <i>P. lavamentivorans</i> - conserved hypothetical protein                                       |
| 24  | 20342 | 20620 | 279         | CP000774         |              | <i>P. lavamentivorans</i> - conserved hypothetical protein                                       |
| 25  | 20908 | 21720 | 813         | CP000774         |              | <i>P. lavamentivorans</i> - conserved hypothetical protein                                       |
| 26  | 21862 | 22215 | 354         | CP000774         |              | <i>P. lavamentivorans</i> - conserved hypothetical protein                                       |
| 27  | 22582 | 23511 | 930         | CP000774         |              | <i>P. lavamentivorans</i> - conserved hypothetical protein                                       |
| 28  | 23570 | 24259 | 690         | CP000774         |              | <i>P. lavamentivorans</i> - conserved hypothetical protein                                       |
| 29  | 24354 | 24680 | 327         | CP000774         |              | <i>P. lavamentivorans</i> - conserved hypothetical protein                                       |
| 30  | 24783 | 25124 | 342         | CP000774         |              | <i>P. lavamentivorans</i> - conserved hypothetical protein                                       |
| 31  | 25211 | 25861 | 651         | CP000539         |              | <i>Acidovorax sp. JS42</i> - conserved hypothetical protein                                      |
| 32  | 25887 | 27035 | 1149        | CP000539         |              | <i>Acidovorax sp. JS42</i> - conserved hypothetical protein                                      |
| 33* | 27086 | 27406 | 321         | CP000352         |              | <i>C. metallidurans</i> – conserved hypothetical protein                                         |
| 34  | 27663 | 27803 | 141         | CP000539         |              | <i>Acidovorax sp. JS42</i> - conserved hypothetical protein                                      |
| 35* | 27940 | 30219 | 2280        | CP000352         |              | <i>C. metallidurans</i> – putative plasmid-related DNA/RNA helicase                              |
| 36  | 30278 | 31000 | 723         | CP000539         |              | <i>Acidovorax sp. JS42</i> - NADPH-dependent FMN reductase                                       |
| 37  | 30993 | 31415 | 423         | CP002287         | <i>arsC1</i> | <i>Achromobacter xylosoxidans</i> - arsenate reductase (glutaredoxin) 1                          |
| 38  | 31432 | 32508 | 1077        | CP002287         |              | <i>A. xylosoxidans</i> - sodium bile acid symporter family protein 1                             |
| 39  | 32520 | 33050 | 531         | CP002287         |              | <i>A. xylosoxidans</i> - low molecular weight phosphotyrosine protein phosphatase family protein |
| 40  | 33017 | 33337 | 321         | CP000539         |              | <i>Acidovorax sp. JS42</i> - transcriptional regulator, ArsR family                              |
| 41  | 33506 | 34084 | 579         | CP000539         |              | <i>Acidovorax sp. JS42</i> - putative secreted protein                                           |
| 42  | 34081 | 34725 | 645         | AM902716         |              | <i>Bordetella petrii</i> - putative membrane protein                                             |
| 43  | 34738 | 35463 | 726         | AM902716         |              | <i>B. petrii</i> - conserved protein, putatively exported                                        |
| 44  | 35445 | 36047 | 603         | CP002449         |              | <i>Alicyclophilus denitrificans</i> - Lytic transglycosylase catalytic                           |
| 45  | 36044 | 36592 | 549         | CP000539         |              | <i>Acidovorax sp. JS42</i> - putative secreted protein                                           |
| 46* | 36597 | 38789 | 2193        | CP000352         | <i>virD4</i> | <i>C. metallidurans</i> – Type IV secretory pathway, VirD4 components                            |
| 47  | 38786 | 39535 | 750         | CP000539         |              | <i>Acidovorax sp. JS42</i> - conserved hypothetical protein                                      |
| 48* | 39576 | 42200 | 2625        | CP000352         |              | <i>C. metallidurans</i> – conserved hypothetical protein                                         |
| 49* | 42210 | 42935 | 726         | CP000352         |              | <i>C. metallidurans</i> – conserved hypothetical protein                                         |
| 50* | 42974 | 43876 | 903         | CP000352         |              | <i>C. metallidurans</i> – conserved hypothetical protein                                         |
| 51* | 43876 | 44376 | 501         | CP000352         |              | <i>C. metallidurans</i> – conserved hypothetical protein                                         |
| 52* | 44373 | 44843 | 471         | CP000352         |              | <i>C. metallidurans</i> – conserved hypothetical protein                                         |
| 53* | 44840 | 45754 | 915         | CP000352         |              | <i>C. metallidurans</i> – putative AAA ATPase                                                    |
| 54* | 45772 | 46275 | 504         | CP000352         |              | <i>C. metallidurans</i> – conserved hypothetical protein                                         |

|     |       |       |      |          |             |                                                                                                                              |
|-----|-------|-------|------|----------|-------------|------------------------------------------------------------------------------------------------------------------------------|
| 55* | 46344 | 46814 | 471  | CP000352 |             | <i>C. metallidurans</i> – putative excisionase                                                                               |
| 56* | 47018 | 47401 | 384  | CP000352 |             | <i>C. metallidurans</i> – conserved hypothetical protein                                                                     |
| 57  | 47398 | 47631 | 234  | CP002287 |             | <i>A. xylosoxidans</i> - hypothetical protein                                                                                |
| 58  | 47648 | 48007 | 360  | CP000539 |             | <i>Acidovorax sp. JS42</i> - conserved hypothetical protein                                                                  |
| 59  | 48019 | 48417 | 399  | CP002287 |             | <i>A. xylosoxidans</i> - hypothetical protein                                                                                |
| 60  | 48414 | 49106 | 693  | CP002287 |             | <i>A. xylosoxidans</i> - hypothetical protein                                                                                |
| 61  | 49103 | 50014 | 912  | CP002287 |             | <i>A. xylosoxidans</i> - hypothetical protein                                                                                |
| 62  | 50004 | 51422 | 1419 | CP002287 |             | <i>A. xylosoxidans</i> - hypothetical protein                                                                                |
| 63  | 51403 | 51858 | 456  | CP000539 |             | <i>Acidovorax sp. JS42</i> - putative secreted protein                                                                       |
| 64* | 51858 | 54758 | 2901 | CP000352 |             | <i>C. metallidurans</i> – Type IV secretory pathway, VirB4 components                                                        |
| 65* | 54783 | 55550 | 768  | CP000352 |             | <i>C. metallidurans</i> – putative exported protein                                                                          |
| 66* | 55726 | 56220 | 495  | CP000352 | <i>radC</i> | <i>C. metallidurans</i> – DNA binding protein                                                                                |
| 67  | 56433 | 56831 | 399  | CP000539 |             | <i>Acidovorax sp. JS42</i> - protein of unknown function DUF1525                                                             |
| 68  | 56828 | 57778 | 951  | CP002287 |             | <i>A. xylosoxidans</i> - hypothetical protein                                                                                |
| 69  | 57788 | 59182 | 1395 | CP000539 |             | <i>Acidovorax sp. JS42</i> - conserved hypothetical protein                                                                  |
| 70  | 59179 | 59538 | 360  | CP000539 |             | <i>Acidovorax sp. JS42</i> - conserved hypothetical protein                                                                  |
| 71  | 59552 | 61072 | 1521 | CP000539 |             | <i>Acidovorax sp. JS42</i> - conserved hypothetical protein                                                                  |
| 72  | 61084 | 61449 | 366  | CP000539 |             | <i>Acidovorax sp. JS42</i> - conserved hypothetical protein                                                                  |
| 73  | 61530 | 62162 | 633  | AM902716 |             | <i>B. petrii</i> - conserved hypothetical protein                                                                            |
| 74  | 62175 | 62801 | 627  | AM902716 |             | <i>B. petrii</i> - conserved hypothetical protein                                                                            |
| 75  | 62769 | 62969 | 201  | AM902716 |             | <i>B. petrii</i> - conserved hypothetical protein                                                                            |
| 76  | 63193 | 64929 | 1737 | CP000539 |             | <i>Acidovorax sp. JS42</i> - relaxase                                                                                        |
| 77  | 64911 | 65021 | 111  |          |             | No significant similarity                                                                                                    |
| 78  | 65071 | 65184 | 114  |          |             | No significant similarity                                                                                                    |
| 79  | 65253 | 65408 | 156  |          |             | No significant similarity                                                                                                    |
| 80  | 65431 | 66726 | 1296 |          |             | No significant similarity                                                                                                    |
| 81  | 66763 | 67227 | 465  |          |             | No significant similarity                                                                                                    |
| 82  | 68072 | 69298 | 1227 | CP000744 |             | <i>Pseudomonas aeruginosa</i> PA7 – transposase, Mutator family                                                              |
| 83  | 69301 | 71631 | 2331 | CP000884 |             | <i>Delftia acidovorans</i> - heavy metal translocating P-type ATPase                                                         |
| 84  | 71745 | 72017 | 273  | CP002287 |             | <i>A. xylosoxidans</i> - hypothetical protein                                                                                |
| 85  | 72051 | 72536 | 486  | CP002287 |             | <i>A. xylosoxidans</i> - hypothetical protein                                                                                |
| 86  | 72574 | 73554 | 981  | CP000539 |             | <i>Acidovorax sp. JS42</i> - copper resistance B precursor                                                                   |
| 87  | 73580 | 75341 | 1762 | CP000539 |             | <i>A. xylosoxidans</i> - copper resistance protein, CopA family                                                              |
| 88  | 75743 | 76447 | 705  | CP000539 |             | <i>Acidovorax sp. JS42</i> - two component heavy metal response transcriptional regulator, winged helix family               |
| 89  | 76419 | 77855 | 1437 | CP002287 |             | <i>A. xylosoxidans</i> - sensor kinase CusS                                                                                  |
| 90  | 78405 | 78515 | 111  |          |             | No significant similarity                                                                                                    |
| 91  | 78490 | 78816 | 327  |          |             | No significant similarity                                                                                                    |
| 92  | 78835 | 79134 | 300  |          |             | No significant similarity                                                                                                    |
| 93  | 79143 | 80810 | 1668 | CP002657 |             | <i>A. denitrificans</i> - hypothetical protein                                                                               |
| 94  | 80881 | 81093 | 213  |          |             | No significant similarity                                                                                                    |
| 95  | 81106 | 82239 | 1134 |          |             | No significant similarity                                                                                                    |
| 96  | 82457 | 82909 | 453  |          |             | No significant similarity                                                                                                    |
| 97  | 83064 | 84380 | 1317 | CP000539 |             | <i>Acidovorax sp. JS42</i> - Cyclopropane-fatty-acyl-phospholipid synthase                                                   |
| 98  | 84498 | 86927 | 2430 | CP000539 |             | <i>Acidovorax sp. JS42</i> - D-xylulose 5-phosphate/D-fructose 6-phosphate phosphoketolase                                   |
| 99  | 87105 | 87707 | 603  |          |             | No significant similarity                                                                                                    |
| 100 | 87824 | 88654 | 831  | AB022919 | <i>psbB</i> | <i>Rhodospseudomonas palustris</i> – oxidoreductase involved in aerobic degradation of para-substituted benzoate derivatives |
| 101 | 88663 | 89925 | 1263 |          |             | No significant similarity                                                                                                    |
| 102 | 89922 | 90977 | 1056 | CP000539 |             | <i>Acidovorax sp. JS42</i> - glyceraldehyde-3 phosphate dehydrogenase                                                        |
| 103 | 91005 | 92627 | 1623 | CP000539 |             | <i>Acidovorax sp. JS42</i> - 2-octaprenylphenol hydroxylase                                                                  |
| 104 | 92624 | 93655 | 1032 | CP000539 |             | <i>Acidovorax sp. JS42</i> - D-isomer specific 2-hydroxyacid dehydrogenase, NAD-binding protein                              |
| 105 | 93652 | 93906 | 255  |          |             | No significant similarity                                                                                                    |
| 106 | 93903 | 94547 | 645  | CP000539 |             | <i>Acidovorax sp. JS42</i> - conserved hypothetical protein                                                                  |
| 107 | 94601 | 95500 | 900  | CP000539 |             | <i>Acidovorax sp. JS42</i> - ribose-phosphate pyrophosphokinase                                                              |

|     |        |        |      |          |                |                                                                                                |
|-----|--------|--------|------|----------|----------------|------------------------------------------------------------------------------------------------|
| 108 | 95497  | 97050  | 1554 | CP000539 |                | <i>Acidovorax sp. JS42</i> - putative thymidine phosphorylase                                  |
| 109 | 97047  | 98408  | 1362 | CP000539 |                | <i>Acidovorax sp. JS42</i> - beta-lactamase domain protein                                     |
| 110 | 98434  | 98925  | 492  | CP002657 |                | <i>A. denitrificans</i> - protein of unknown function DUF477                                   |
| 111 | 98933  | 99820  | 888  |          |                | No significant similarity                                                                      |
| 112 | 99840  | 100451 | 612  | CP000539 |                | <i>Acidovorax sp. JS42</i> - LemA family protein                                               |
| 113 | 100448 | 101773 | 1326 | CP002657 |                | <i>A. denitrificans</i> - major facilitator superfamily MFS 1                                  |
| 114 | 101787 | 104252 | 2466 | CP002657 |                | <i>A. denitrificans</i> - copper translocating P-type ATPase                                   |
| 115 | 104285 | 105148 | 864  | CP000539 |                | <i>Acidovorax sp. JS42</i> - protein of unknown function DUF344                                |
| 116 | 105159 | 105317 | 159  |          |                | No significant similarity                                                                      |
| 117 | 105319 | 105969 | 651  |          |                | No significant similarity                                                                      |
| 118 | 105966 | 106205 | 240  |          |                | No significant similarity                                                                      |
| 119 | 106217 | 106618 | 402  |          |                | No significant similarity                                                                      |
| 120 | 106830 | 107354 | 525  |          |                | No significant similarity                                                                      |
| 121 | 107339 | 107743 | 405  |          |                | No significant similarity                                                                      |
| 122 | 107746 | 108972 | 1227 | CP000744 |                | <i>P. aeruginosa</i> PA7 – transposase, Mutator family                                         |
| 123 | 109005 | 109229 | 225  | CP002287 |                | <i>A. xylosoxidans</i> – copper-translocating P-type ATPase 2                                  |
| 124 | 109371 | 109757 | 387  | CP002287 | <i>copC</i>    | <i>A. xylosoxidans</i> - copper resistance protein C                                           |
| 125 | 109762 | 110688 | 927  | CP002287 | <i>copD</i>    | <i>A. xylosoxidans</i> - copper resistance protein D                                           |
| 126 | 110817 | 111101 | 285  | CP002287 |                | <i>A. xylosoxidans</i> - hypothetical protein                                                  |
| 127 | 111335 | 112225 | 891  | CP002287 |                | <i>A. xylosoxidans</i> - transcriptional regulator 2                                           |
| 128 | 112230 | 112349 | 120  | CP002287 |                | <i>A. xylosoxidans</i> - helix-turn-helix family protein 2                                     |
| 129 | 112350 | 112568 | 219  | CP002287 |                | <i>A. xylosoxidans</i> - helix-turn-helix family protein 2                                     |
| 130 | 112760 | 113284 | 525  | CP002287 |                | <i>A. xylosoxidans</i> - bacterial regulatory helix-turn-helix protein, LysR family protein 34 |
| 131 | 113313 | 113417 | 105  | CP002287 |                | <i>A. xylosoxidans</i> - hypothetical protein                                                  |
| 132 | 113571 | 113882 | 312  | CP002287 |                | <i>A. xylosoxidans</i> - hypothetical protein                                                  |
| 133 | 113958 | 115265 | 1308 | CP002287 |                | <i>A. xylosoxidans</i> - heavy metal RND efflux outer membrane protein, CzcC family            |
| 134 | 115281 | 116798 | 1518 | CP002287 |                | <i>A. xylosoxidans</i> - efflux transporter, RND family, MFP subunit 3                         |
| 135 | 116795 | 119914 | 3120 | CP000539 |                | <i>Acidovorax sp. JS42</i> - heavy metal efflux pump, CzcA family                              |
| 136 | 120073 | 121170 | 1098 | AP008229 | <i>XOO4197</i> | <i>Xanthomonas oryzae</i> - ISXoo14 transposase                                                |
| 137 | 122005 | 123909 | 1905 | CP000539 |                | <i>Acidovorax sp. JS42</i> - phage integrase family protein                                    |

\*Also found on *Pseudomonas aeruginosa* gene island PAGI-2(C)

### Origin of DNA

|                                                                                     |             |                                                                                     |                |                                                                                     |                  |                                                                                      |             |
|-------------------------------------------------------------------------------------|-------------|-------------------------------------------------------------------------------------|----------------|-------------------------------------------------------------------------------------|------------------|--------------------------------------------------------------------------------------|-------------|
|  | Cupriavidus |  | Achromobacter  |  | Pseudomonas      |  | Xanthomonas |
|  | Parvibaclum |  | Bordetella     |  | Rhodopseudomonas |  | No homology |
|  | Acidovorax  |  | Alicyclophilus |  | Delftia          |                                                                                      |             |

**Table S2. Potential Deletions in PA Strain 3**

| <b>Size of Deletion (bp)</b> | <b>Putative Gene Function of Deletion Site</b>   |
|------------------------------|--------------------------------------------------|
| 1                            | putative Rossmann fold nucleotide-binding        |
| 7                            | No gene                                          |
| 1                            | No gene                                          |
| 1                            | <i>MoeA1</i> , Molybdopterin biosynthesis enzyme |
| 4                            | putative sodium/hydrogen exchanger               |
| 2                            | single-stranded-DNA-specific exonuclease RecJ    |
| 2                            | putative transcriptional regulator, AraC family  |
| 3                            | conserved hypothetical protein                   |
| 1                            | conserved hypothetical protein                   |
| 3                            | putative oxidase                                 |
| 7                            | cytochrome C <i>Snr1</i>                         |
| 3                            | putative molybdopterin-guanine dinucleotide      |
| 3                            | putative diacylglycerol kinase                   |
| 3                            | putative ABC transporter, permease protein       |
| 5                            | conserved hypothetical protein                   |
| 1                            | putative chemotaxis transducer                   |
| 6                            | gluconokinase                                    |
| 2                            | hypothetical protein                             |
| 7                            | putative DNA helicase                            |
| 5                            | No gene                                          |
| 8                            | glutaminyl-tRNA synthetase                       |
| 10                           | No gene                                          |
| 1                            | putative transcriptional regulator               |
| 1                            | No gene                                          |
| 2                            | hypothetical protein                             |
| 2                            | alkaline protease secretion protein <i>AprD</i>  |
| 2                            | probable MFS transporter                         |
| 3                            | No gene                                          |
| 7                            | No gene                                          |
| 18                           | putative MFS transporter                         |
| 1                            | conserved hypothetical protein                   |
| 5                            | putative 3-hydroxyacyl-CoA dehydrogenase         |
| 1                            | putative ABC transporter ATP-binding             |
