# Supplementary material
Source: PubMed Central journal article supplement (PMC4097748)
Supplement: JCM.01626-13_zjm999093520so2.pdf [file JCM.01626-13_zjm999093520so2.pdf]

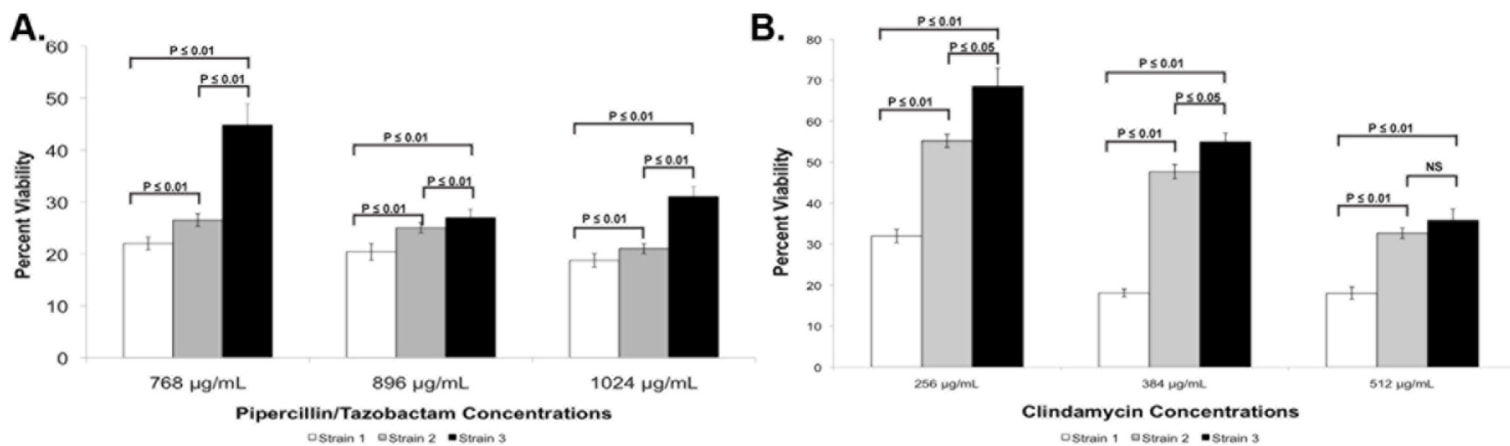

**Fig S1A.** Compared to strain 1, strains 2 and 3 are significantly more resistant to piperacillin/tazobactam, though it should be noted that these very high concentrations are not clinically relevant. **B.** Compared to strain 1, strains 2 and 3 are significantly more resistant to clindamycin.
